# Supplementary material for: A new building block, bis(thiophene vinyl)-pyrimidine, for constructing excellent two-photon absorption materials: synthesis, crystal structure and properties
Source: Royal Society of Chemistry journal article supplement (doi:10.1039/c2jm14766a), 2012-01-01
Supplement: c2jm14766a.pdf [file c2jm14766a.pdf]

## **Supplementary Information**

### **A new building block, bis(thiophene vinyl)-pyrimidine, for constructing excellent two-photon absorption materials: synthesis, crystal structure and properties**

Dugang Chen, Cheng Zhong, Xiaohu Dong, Zhihong Liu and Jingui Qin\*

*Department of Chemistry, Wuhan University, Wuhan 430072, China*

*Corresponding author: J. Qin (E-mail: jgqin@whu.edu.cn)*

## The details of the crystal data for Py1

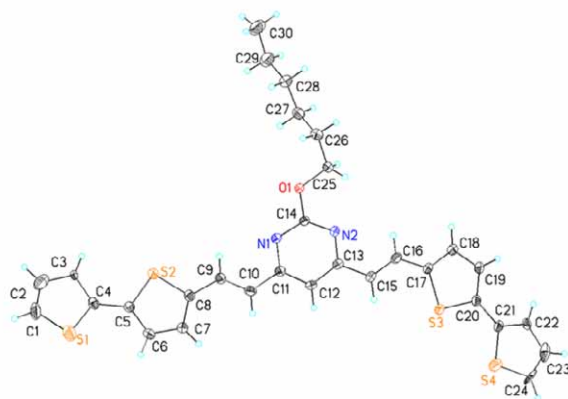

Single crystal structure plot of Py1

CCDC number: 843125.

**Table 1** Crystal data and structure refinement.

|                                  |                                                              |                            |
|----------------------------------|--------------------------------------------------------------|----------------------------|
| Empirical formula                | $C_{30}H_{28}N_2OS_4$                                        |                            |
| Formula weight                   | 560.82                                                       |                            |
| Temperature                      | 298(2) K                                                     |                            |
| Wavelength                       | 0.71073 Å                                                    |                            |
| Crystal system                   | Monoclinic                                                   |                            |
| Space group                      | P2(1)/c                                                      |                            |
| Unit cell dimensions             | $a = 9.9129(8)$ Å                                            | $\alpha = 90^\circ$        |
|                                  | $b = 31.483(2)$ Å                                            | $\beta = 105.132(2)^\circ$ |
|                                  | $c = 18.6483(14)$ Å                                          | $\gamma = 90^\circ$        |
| Volume                           | $5618.1(8)$ Å <sup>3</sup>                                   |                            |
| Z                                | 8                                                            |                            |
| Density (calculated)             | 1.326 Mg/m <sup>3</sup>                                      |                            |
| Absorption coefficient           | 0.365 mm <sup>-1</sup>                                       |                            |
| F(000)                           | 2352                                                         |                            |
| Crystal size                     | 0.16 x 0.12 x 0.10 mm <sup>3</sup>                           |                            |
| Theta range for data collection  | 2.22 to 25.02°                                               |                            |
| Index ranges                     | $-11 \leq h \leq 11, -36 \leq k \leq 37, -22 \leq l \leq 14$ |                            |
| Reflections collected            | 29669                                                        |                            |
| Independent reflections          | 9906 [R(int) = 0.0958]                                       |                            |
| Completeness to $\theta = 25.02$ | 99.8 %                                                       |                            |
| Absorption correction            | None                                                         |                            |
| Max. and min. transmission       | 0.9644 and 0.9439                                            |                            |

|                                   |                                             |
|-----------------------------------|---------------------------------------------|
| Refinement method                 | Full-matrix least-squares on F <sup>2</sup> |
| Data / restraints / parameters    | 9906 / 0 / 761                              |
| Goodness-of-fit on F <sup>2</sup> | 1.043                                       |
| Final R indices [I > 2σ (I)]      | R1 = 0.0734, wR2 = 0.1810                   |
| Largest diff. peak and hole       | 0.443 and -0.401 e.Å <sup>-3</sup>          |

---

**Table 2** Some main torsion angles.

---

|                         |           |
|-------------------------|-----------|
| S(1)-C(4)-C(5)-C(6)     | 8.1(6)    |
| S(1)-C(4)-C(5)-S(2)     | -169.7(2) |
| C(7)-C(8)-C(9)-C(10)    | 3.0(8)    |
| C(8)-C(9)-C(10)-C(11)   | -174.5(4) |
| C(9)-C(10)-C(11)-N(1)   | 16.1(6)   |
| N(2)-C(13)-C(15)-C(16)  | -7.7(7)   |
| C(12)-C(13)-C(15)-C(16) | 170.0(4)  |
| C(13)-C(15)-C(16)-C(17) | -173.1(4) |
| C(15)-C(16)-C(17)-C(18) | 167.7(5)  |
| C(15)-C(16)-C(17)-S(3)  | -8.3(7)   |
| C(19)-C(20)-C(21)-C(22) | -5(20)    |
| S(3)-C(20)-C(21)-C(22)  | 172(11)   |

---
